# Supplementary material for: Histone demethylase KDM4B regulates otic vesicle invagination via epigenetic control of Dlx3 expression
Source: PubMed Central journal article supplement — J Cell Biol. 2015 Nov 23;211(4):815–27. doi: 10.1083/jcb.201503071 (PMC4657164; doi:10.1083/jcb.201503071), 2015-11-23
Supplement: supp_jcb.201503071_JCB_201503071_sm.pdf [file supp_jcb.201503071_JCB_201503071_sm.pdf]

Uribe et al., <http://www.jcb.org/cgi/content/full/jcb.201503071>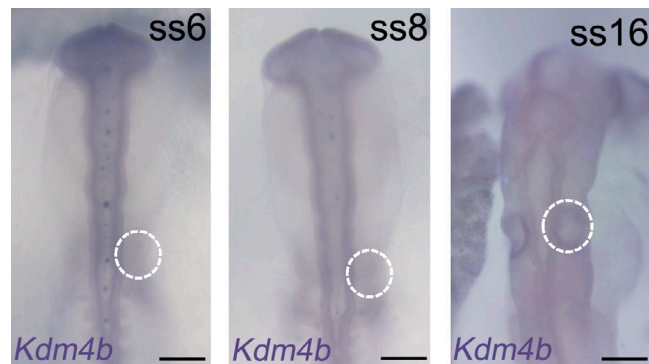

Figure S1. ***Kdm4b* is expressed in the presumptive otic ectoderm.** We assessed the presence of *Kdm4b* transcripts at early stages of otic development by ISH. ss6/st9<sup>-</sup> (left) and ss8/9<sup>+</sup> (middle) show presence of *Kdm4b* in the presumptive otic ectoderm (dashed circles). By ss16/st12 (right), *Kdm4b* is evidenced at the border of the invaginating otic vesicle. Bars, 200  $\mu$ m.

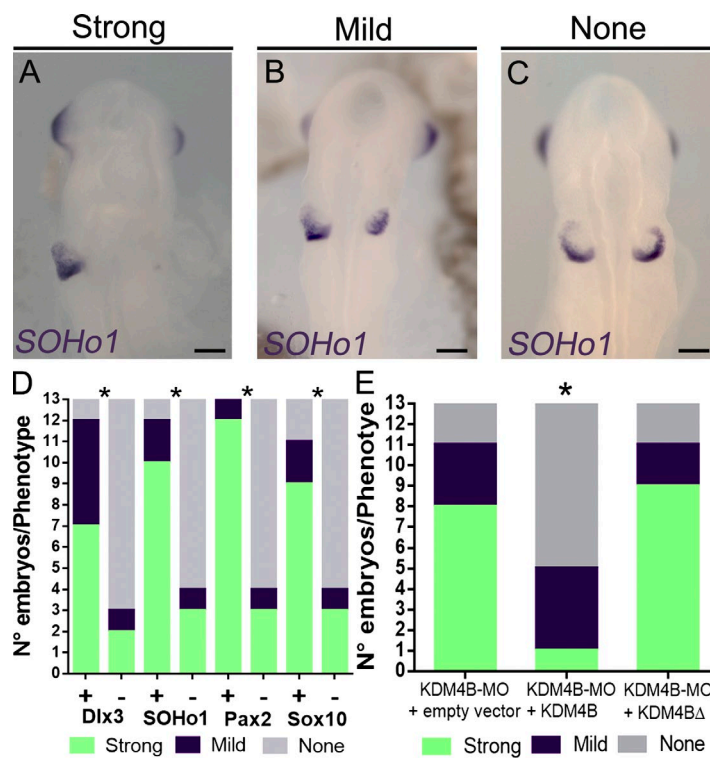

Figure S2. **Strong and mild phenotype caused by KDM4B-MO electroporation.** (A–C) Embryos showing strong (A), mild (B), and no (C) phenotype after KDM4B knockdown when injecting KDM4B-MO on the right side of the embryo. The severity of the phenotype is indicated by *SOHo1* expression, which is lost in the severe phenotypes, and diminishes when the otic domain is reduced. (D) Quantification of the numbers of KDM4B-MO (+)–treated embryos with strong, mild, or nonphenotypes compared with control-MO (–)–treated embryos indicate that the KDM4B-MO treatment induces reduction of the otic domain for all inner ear markers tested. \*,  $P < 0.0001$  by contingency table followed a  $\chi^2$  test. (E) Quantification of the percentage of KDM4B knockdown (KDM4B-MO plus empty vector), and rescued with the full-length (KDM4B-MO plus KDM4B) or catalytically dead mutant (KDM4B-MO plus KDM4B $\Delta$ ) embryos with either strong, mild, or nonreduction of the otic domain indicated by the *SOHo1* marker. \*,  $P < 0.01$ ; significant differences are compared with the control by contingency table followed a  $\chi^2$  test. Bars, 200  $\mu$ m.

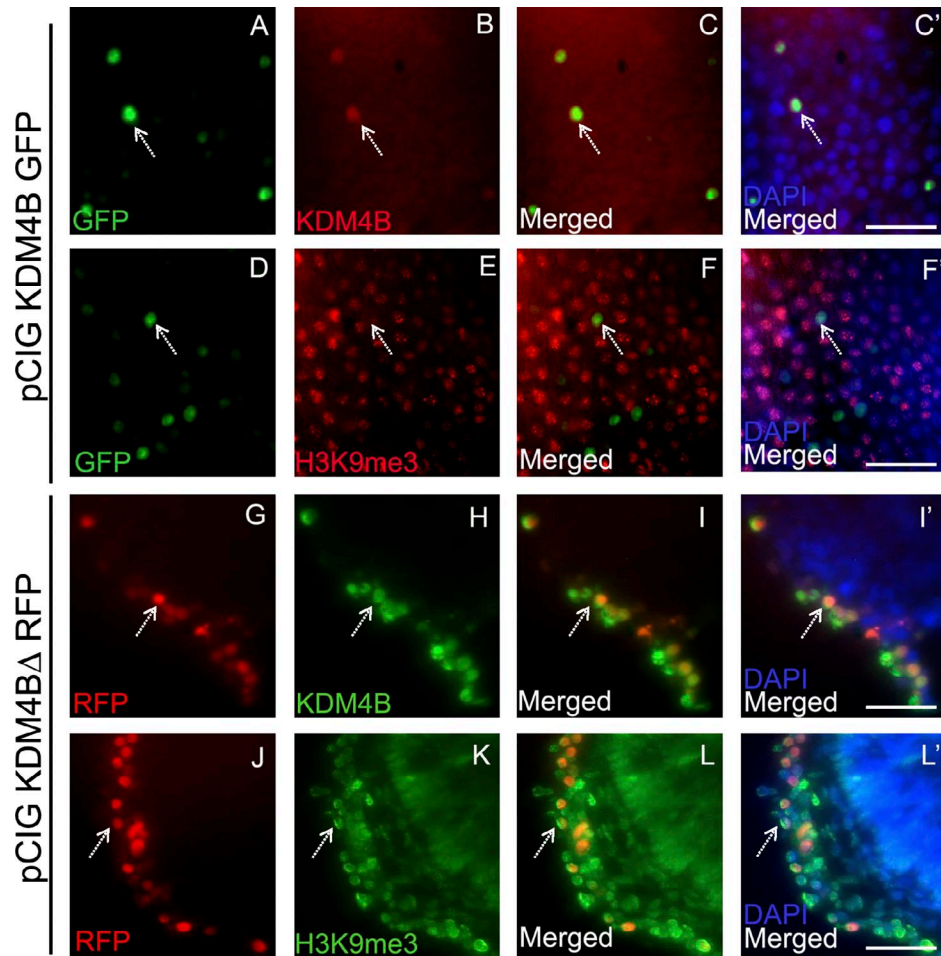

Figure S3. **Characterization of KDM4B and KDM4B $\Delta$  overexpressing vectors.** Electroporation of overexpressing vector containing KDM4B (A–C) and KDM4B $\Delta$  (G–I) exhibit normal protein expression on the nucleus as indicated by immunohistochemistry using an anti-KDM4B antibody. Overexpression of KDM4B (D–F) is capable of erasing the H3K9me3 mark on electroporated cells (arrows). In contrast, the catalytically dead mutant KDM4B $\Delta$  (J–L) fails to alter H3K9me3 abundance on electroporated cells (arrows). Bars, 200  $\mu$ m.

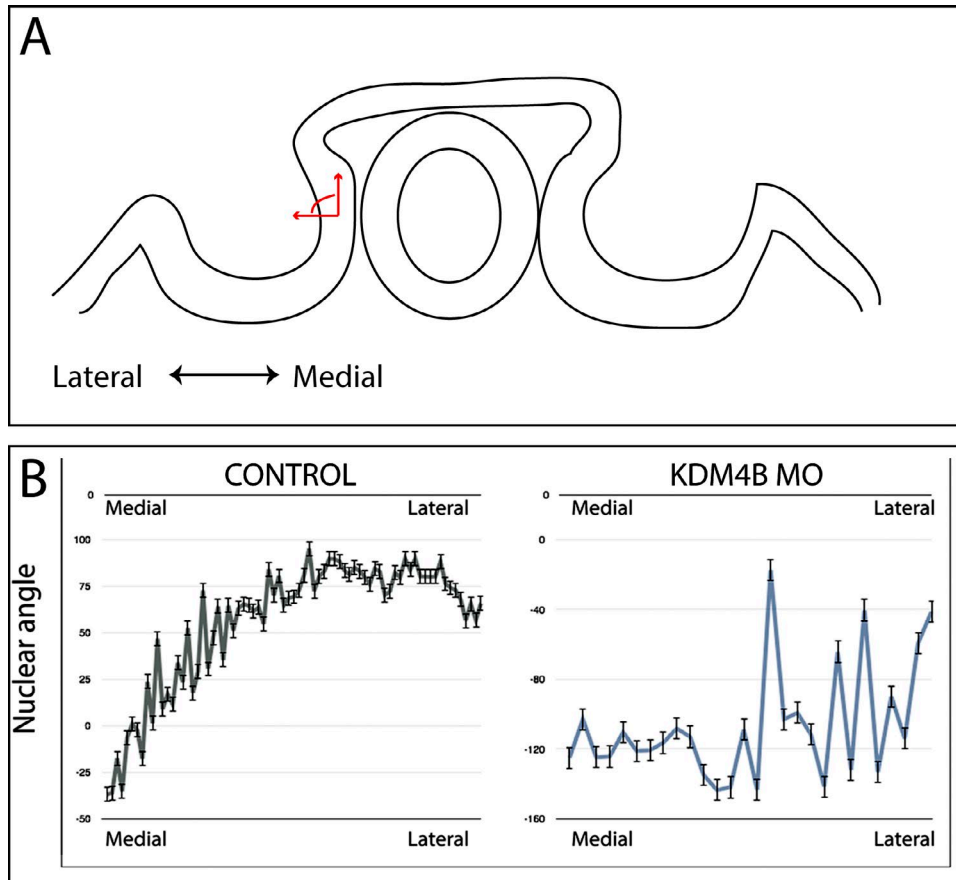

Figure S4. **Depletion of KDM4B affects proper nuclear orientation in the invaginating otic placode.** Nuclei angle measurements were along the mediolateral axis of the otic vesicle at stage 13, as depicted in the schematic in A. Graphical representation of measurements reveal a disrupted nuclear orientation of the otic ectoderm cells after introduction of KDM4B-MO compared with the control side (B). Error bars indicate  $\pm$ SEM.

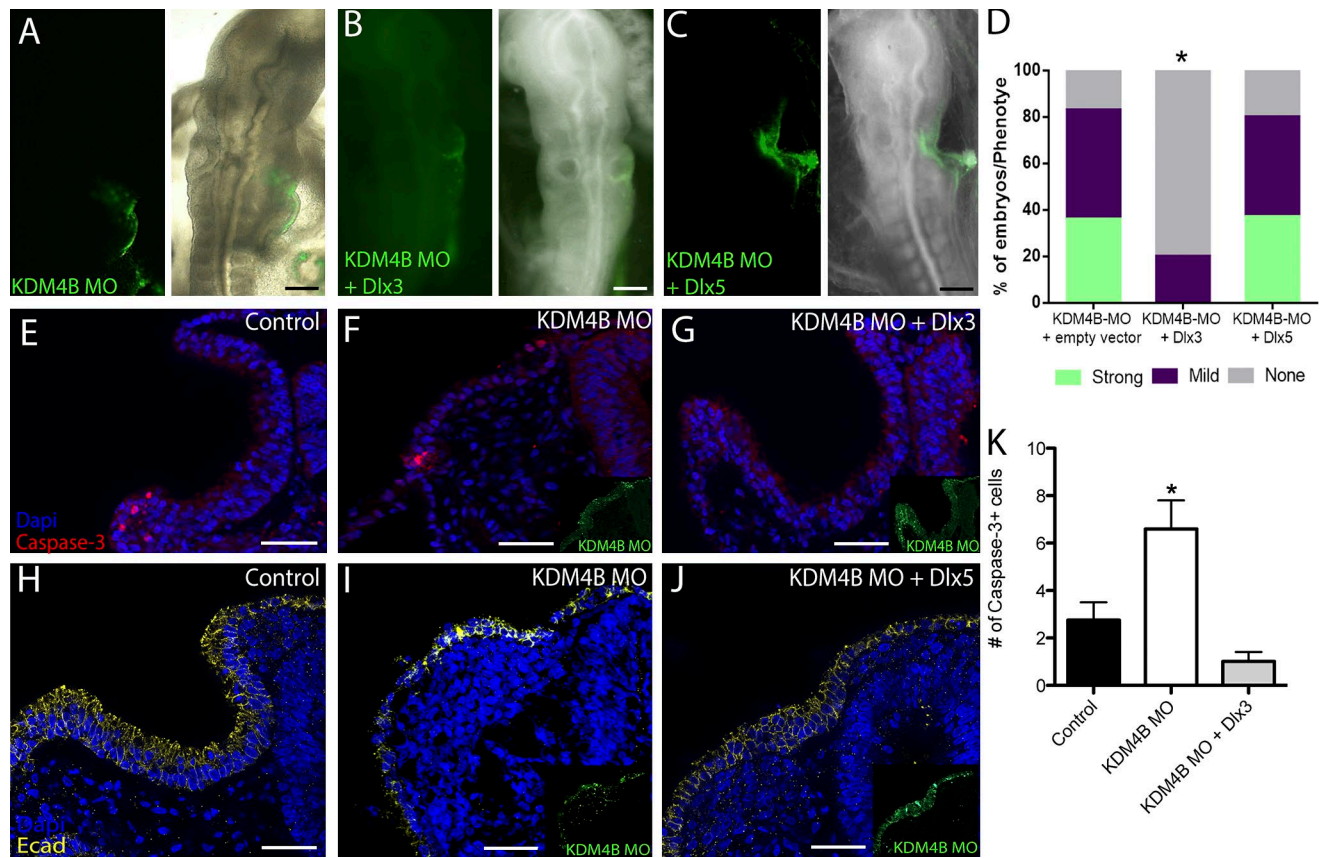

Figure S5. **Coelectroporation of KDM4B-MO with pCIG-Dlx3 was sufficient to rescue cell death and otic vesicle size, whereas coelectroporation of KDM4B-MO with pCIG-Dlx5 was not enough to rescue the phenotype.** (A–C) To assess the rescue of KDM4B-MO–treated embryos with *Dlx3* or the orthologous *Dlx5* gene, we analyzed the severity of the phenotypes upon coelectroporation: KDM4B-MO plus empty vector (A), KDM4B-MO plus *Dlx3* (B), or KDM4B-MO plus *Dlx5* targeted to the otic ectoderm (green; C). (D) Our results show 80% of rescued otic vesicles when electroporating KDM4B-MO plus pCIG-*Dlx3*, but not with *Dlx5*. Data shown are the combined counts from three biological replicates. (E–G and K) Embryos electroporated with either KDM4B-MO plus empty vector or KDM4B-MO plus pCIG-*Dlx3* were analyzed by Caspase3 immunostaining, showing a rescue in cell death. Error bars in K indicate  $\pm$ SEM. (D and H–J) To provide specificity for the rescue experiments, we coelectroporated KDM4B-MO with pCIG-*Dlx5*. Our data show that *Dlx5* was not sufficient to rescue invagination defects as indicated by E-cad distribution. \*,  $P < 0.05$  with Student's *t* test. Bars: (A–C) 180  $\mu$ m; (E–J) 50  $\mu$ m.

Table S1. List of primers used for qPCR

| Target gene                             | Sequence                             |
|-----------------------------------------|--------------------------------------|
| <b>qPCR primers</b>                     |                                      |
| <i>Dlx3</i> F                           | 5'-GGCTCTTCCTTCACCGACAC-3'           |
| <i>Dlx3</i> R                           | 5'-GCACCTCGCCGTTCTTGAG-3'            |
| <i>Pax2</i> F                           | 5'-GGTGGACCCTGTGACATTTTC-3'          |
| <i>Pax2</i> R                           | 5'-TCTCCCAAGCGAACATGGTG-3'           |
| <i>Soho1</i> F                          | 5'-GCCTTCAGCATCGACAGCATC-3'          |
| <i>Soho1</i> R                          | 5'-TCCGTGGAGAGCGGTGAAAC-3'           |
| <i>Sox10</i> F                          | 5'-GCAGCATGGAGTCTCCTTGT-3'           |
| <i>Sox10</i> R                          | 5'-ACTGAGGCCTGGAGATGGAT-3'           |
| <i>GAPDH</i> F                          | 5'-AAAGTCGGAGTCAACGGATTT-3'          |
| <i>GAPDH</i> R                          | 5'-TTGATCACAAGTTTCCCGTTC-3'          |
| <b>ChIP-qPCR primers</b>                |                                      |
| <i>Dlx3</i> +1kb F                      | 5'-AATCCCAATGAGCCGTCATA-3'           |
| <i>Dlx3</i> +1kb R                      | 5'-CCCTACGACGATCCCTACAA-3'           |
| <i>Dlx3</i> -0.5kb F                    | 5'-CAGTCCCAAATTGGTTCAGC-3'           |
| <i>Dlx3</i> -0.5kb R                    | 5'-GTTCCCAAGGAGCTGAGGA-3'            |
| <i>Pax2</i> +1.5kb F                    | 5'-AAAGTAGCGACCCCAAAGT-3'            |
| <i>Pax2</i> +1.5kb R                    | 5'-CGCCCTTACCTGTTTATGGA-3'           |
| <i>Pax2</i> -0.5kb F                    | 5'-CCTTCATTTCTCCCATCTCC-3'           |
| <i>Pax2</i> -0.5kb R                    | 5'-CCCCAGAAAGACACCGTTAG-3'           |
| <i>Soho1</i> +1kb F                     | 5'-GACGCTGTGTTTTGCCATT-3'            |
| <i>Soho1</i> +1kb R                     | 5'-CCTGGCTCTTGAGAAGATG-3'            |
| <i>Soho1</i> -0.5kb F                   | 5'-CCAAACCCTTCTTCCACA-3'             |
| <i>Soho1</i> -0.5kb R                   | 5'-GTGCCCTGCTCAGTACCTTC-3'           |
| <b>KDM4B<math>\Delta</math> primers</b> |                                      |
| A <i>KDM4B</i> F                        | 5'-AAAATCGATTCTGGAAATATGGGGTC-3'     |
| B <i>KDM4Bmut</i> R                     | 5'-CTGTGTAGCCCAAGCAGCCGTTGTCTT-3'    |
| C <i>KDM4Bmut</i> F                     | 5'-GCTGCTTGGGCTACACAGGACATGGATCTC-3' |
| D <i>KDM4B</i> R                        | 5'-AAACCCGGTGGTTAAACATGTTGCT-3'      |
